# Supplementary material for: Multifunctional luminescence properties of co-doped lanthanide metal organic frameworks
Source: Royal Society of Chemistry journal article supplement (doi:10.1039/c5dt00249d), 2015-01-01
Supplement: c5dt00249d1.pdf [file c5dt00249d1.pdf]

## Supporting Information

# Multifunctional Luminescence properties of Co-doped Lanthanide Metal Organic Frameworks

Shanghua Xing,<sup>a</sup> Guang Zeng,<sup>a</sup> Xiaomin Liu,<sup>b</sup> Fen Yang,<sup>a</sup> Zhiqiang Hao,<sup>a</sup> Wei Gao,<sup>a</sup> Yulin Yang,<sup>a</sup> Xiuru Wang,<sup>a</sup> Guanghua Li,<sup>\*a</sup> Zhan Shi,<sup>†</sup> and Shouhua Feng<sup>a</sup>

<sup>a</sup> State Key Laboratory of Inorganic Synthesis and Preparative Chemistry, College of Chemistry, Jilin University, 2699 Qianjin Street, Changchun 130012, P. R. China  
E-mail: [leegh@jlu.edu.cn](mailto:leegh@jlu.edu.cn)

<sup>b</sup> State Key Laboratory of Luminescence and Applications Changchun Institute of Optics, Fine Mechanics and Physics, Chinese Academy of Sciences, Changchun 130033, China

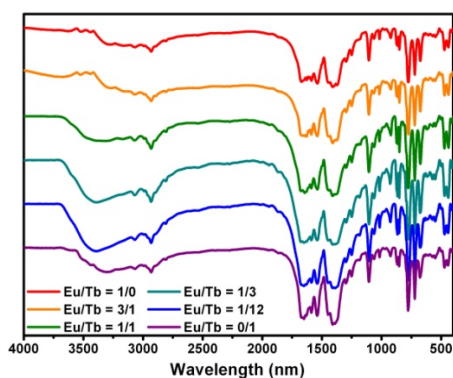

Figure S1. IR spectra of compound 1-6.

Table S1. Selected bond lengths (Å) for compound 1-6.

|              | Eu:Tb=3/1 | Eu:Tb=1/1 | Eu:Tb=1/3 | Eu:Tb=1/12 | Eu:Tb=0/1 |
|--------------|-----------|-----------|-----------|------------|-----------|
| M(1)-O(1)#1  | 2.348(5)  | 2.335(5)  | 2.339(4)  | 2.320(4)   | 2.318(5)  |
| M(1)-O(10)#2 | 2.366(4)  | 2.360(4)  | 2.365(5)  | 2.352(4)   | 2.341(5)  |
| M(1)-O(9)#3  | 2.383(4)  | 2.380(4)  | 2.375(4)  | 2.372(4)   | 2.363(5)  |
| M(1)-O(2)    | 2.418(4)  | 2.414(5)  | 2.409(5)  | 2.399(4)   | 2.388(5)  |
| M(1)-O(26)   | 2.435(5)  | 2.426(5)  | 2.427(5)  | 2.417(5)   | 2.398(6)  |
| M(1)-O(24)   | 2.472(5)  | 2.462(5)  | 2.459(5)  | 2.448(4)   | 2.437(5)  |
| M(1)-O(25)   | 2.467(6)  | 2.466(6)  | 2.474(6)  | 2.453(5)   | 2.470(6)  |
| M(1)-O(23)   | 2.479(5)  | 2.472(5)  | 2.474(5)  | 2.466(5)   | 2.460(6)  |
| M(1)-O(1)    | 2.827(5)  | 2.831(5)  | 2.836(5)  | 2.847(5)   | 2.816(6)  |
|              |           |           |           |            |           |
| M(2)-O(17)   | 2.295(4)  | 2.288(4)  | 2.292(5)  | 2.281(4)   | 2.274(5)  |
| M(2)-O(3)    | 2.320(5)  | 2.315(5)  | 2.327(5)  | 2.297(5)   | 2.297(5)  |
| M(2)-O(4)#4  | 2.331(4)  | 2.322(4)  | 2.324(5)  | 2.315(4)   | 2.304(5)  |
| M(2)-O(27)   | 2.344(6)  | 2.335(6)  | 2.346(6)  | 2.338(5)   | 2.328(7)  |
| M(2)-O(28)   | 2.473(5)  | 2.464(5)  | 2.468(5)  | 2.453(5)   | 2.457(6)  |
| M(2)-O(8)    | 2.483(5)  | 2.471(4)  | 2.473(5)  | 2.470(4)   | 2.457(5)  |
| M(2)-O(29)   | 2.477(5)  | 2.468(5)  | 2.482(5)  | 2.463(5)   | 2.460(6)  |
| M(2)-O(7)    | 2.502(5)  | 2.503(4)  | 2.500(4)  | 2.489(4)   | 2.487(5)  |
|              |           |           |           |            |           |
| M(3)-O(21)#1 | 2.306(4)  | 2.300(4)  | 2.296(5)  | 2.286(4)   | 2.286(6)  |
| M(3)-O(13)   | 2.342(5)  | 2.339(4)  | 2.338(5)  | 2.327(4)   | 2.317(5)  |
| M(3)-O(14)#5 | 2.404(4)  | 2.397(4)  | 2.399(4)  | 2.381(4)   | 2.374(5)  |
| M(3)-O(22)#6 | 2.408(5)  | 2.396(5)  | 2.402(4)  | 2.387(4)   | 2.379(5)  |
| M(3)-O(30)   | 2.418(5)  | 2.407(5)  | 2.410(6)  | 2.407(5)   | 2.393(6)  |
| M(3)-O(5)    | 2.455(5)  | 2.449(5)  | 2.452(5)  | 2.438(5)   | 2.429(6)  |
| M(3)-O(6)    | 2.468(5)  | 2.460(4)  | 2.456(5)  | 2.450(4)   | 2.452(6)  |
| M(3)-O(31)   | 2.469(6)  | 2.459(5)  | 2.471(5)  | 2.441(5)   | 2.442(6)  |

|              |          |          |          |          |          |
|--------------|----------|----------|----------|----------|----------|
| M(4)-O(19)   | 2.321(5) | 2.309(5) | 2.309(5) | 2.295(4) | 2.286(6) |
| M(4)-O(20)#7 | 2.319(5) | 2.315(4) | 2.313(5) | 2.308(4) | 2.301(5) |
| M(4)-O(12)#2 | 2.327(5) | 2.321(5) | 2.323(5) | 2.311(4) | 2.303(6) |
| M(4)-O(33)   | 2.445(5) | 2.437(5) | 2.439(5) | 2.429(5) | 2.425(6) |
| M(4)-O(15)#8 | 2.453(4) | 2.448(4) | 2.451(5) | 2.438(4) | 2.431(5) |
| M(4)-O(32)   | 2.456(7) | 2.450(7) | 2.450(6) | 2.432(6) | 2.444(7) |
| M(4)-O(34)   | 2.462(5) | 2.461(5) | 2.465(5) | 2.449(4) | 2.455(6) |
| M(4)-O(16)#8 | 2.486(5) | 2.476(4) | 2.478(4) | 2.472(4) | 2.459(6) |

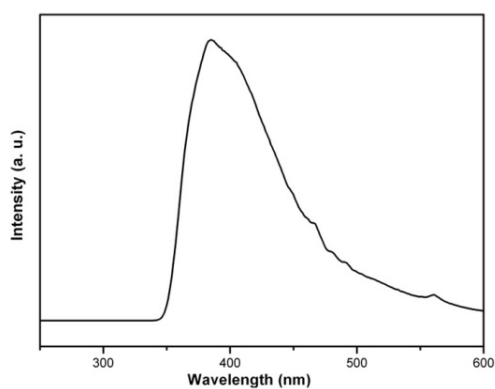

Figure S2. The emission spectra of Ligand H<sub>3</sub>bpt.

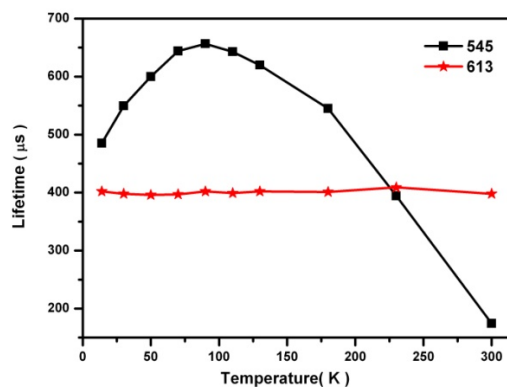

Figure S3. Temperature dependence of the <sup>5</sup>D<sub>4</sub> and <sup>5</sup>D<sub>0</sub> lifetime (14–300 K) for compound 3. The decay curves are monitored at 545 and 613 nm, respectively, excited at 355 nm.

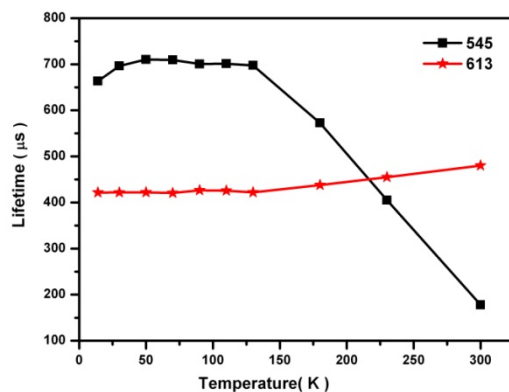

Figure S4. Temperature dependence of the  $^5D_4$  and  $^5D_0$  lifetime (14–300 K) for compound 4. The decay curves are monitored at 545 and 613nm, respectively, excited at 355nm.

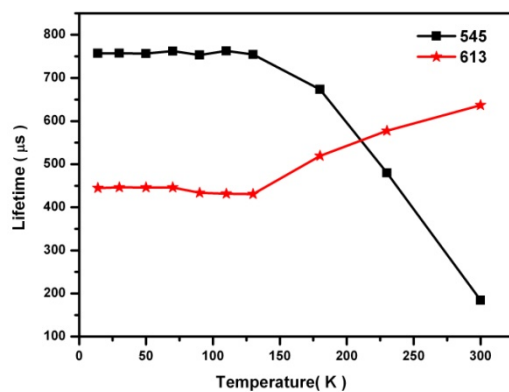

Figure S5. Temperature dependence of the  $^5D_4$  and  $^5D_0$  lifetime (14–300 K) for compound 5. The decay curves are monitored at 545 and 613nm, respectively, excited at 355nm.

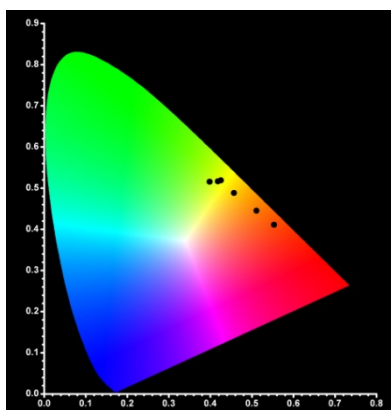

Figure S6. The CIE chromaticity coordinates diagram for compound 6 monitored under 320 nm.

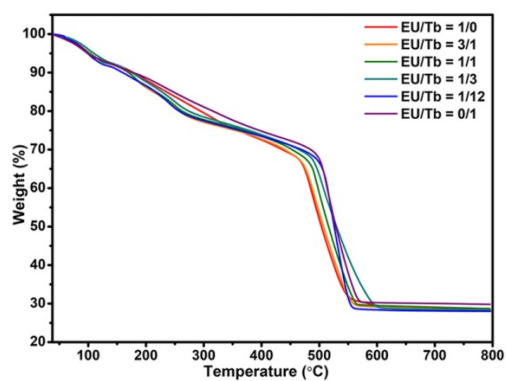

Figure S7. The TG curves for compounds 1-6.

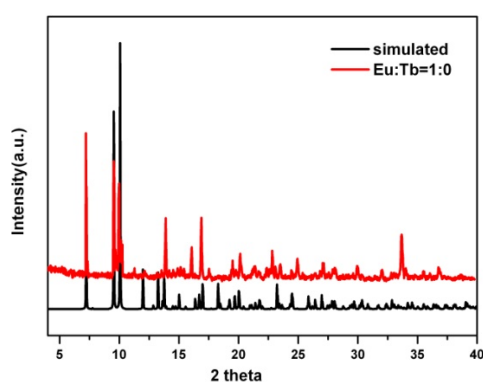

Figure S8. Powder X-ray diffraction patterns of simulated 1-Eu, and as-synthesized compound 1.

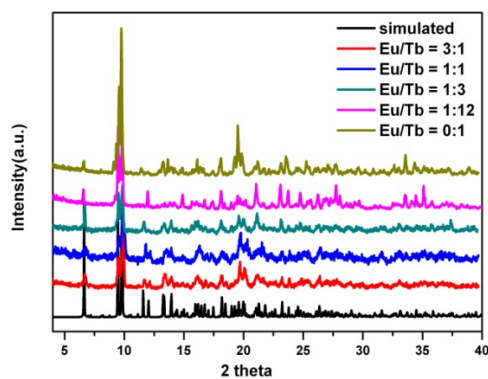

Figure S9. Powder X-ray diffraction patterns of simulated 2-Tb, and as-synthesized compound 2-6.

Table S2. The Quantum Yield of the compounds 1-6.

| Compounds     | Eu/Tb = 1/0 | Eu/Tb = 3/1 | Eu/Tb = 1/1 | Eu/Tb = 1/3 | Eu/Tb = 1/12 | Eu/Tb = 0/1 |
|---------------|-------------|-------------|-------------|-------------|--------------|-------------|
| Quantum Yield | 27.38%      | 56.75%      | 54.94%      | 31.81%      | 47.32%       | 28.11%      |

Table S3. The chemical composition of the compounds 3-6 by ICP.

| Compounds    | The mole ratio (Eu/Tb) Measured | Molecular formula                                                                                    |
|--------------|---------------------------------|------------------------------------------------------------------------------------------------------|
| Eu/Tb = 3/1  | 20.25/6.79                      | C <sub>81</sub> H <sub>99</sub> N <sub>7</sub> O <sub>42</sub> TbEu <sub>3</sub>                     |
| Eu/Tb = 1/1  | 12.42/13.16                     | C <sub>81</sub> H <sub>99</sub> N <sub>7</sub> O <sub>42</sub> Tb <sub>2</sub> Eu <sub>2</sub>       |
| Eu/Tb = 1/3  | 5.98/20.31                      | C <sub>81</sub> H <sub>99</sub> N <sub>7</sub> O <sub>42</sub> Tb <sub>3</sub> Eu                    |
| Eu/Tb = 1/12 | 2.06/24.69                      | C <sub>81</sub> H <sub>99</sub> N <sub>7</sub> O <sub>42</sub> Tb <sub>3.69</sub> Eu <sub>0.31</sub> |

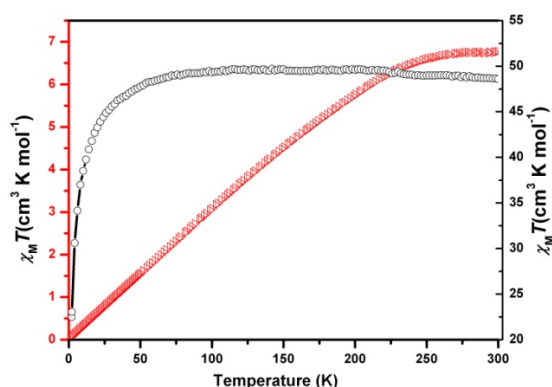

Figure S10. Temperature dependence of the  $\chi_M T$  product at 1000 Oe for compound 1 (red) and 2 (black).

Table S3. Bond lengths (Å) for compounds 1-6.

Eu/Tb=1/0

|                     |            |                     |            |
|---------------------|------------|---------------------|------------|
| Eu(1)-O(3)#1        | 2.369(3)   | Eu(1)-O(10)         | 2.469(5)   |
| Eu(1)-O(1)#2        | 2.372(3)   | Eu(1)-O(5)          | 2.483(3)   |
| Eu(1)-O(2)#3        | 2.402(3)   | Eu(1)-O(6)          | 2.494(3)   |
| Eu(1)-O(9)          | 2.439(5)   | Eu(1)-O(3)#4        | 2.727(3)   |
| Eu(1)-O(4)#4        | 2.445(3)   |                     |            |
|                     |            |                     |            |
| O(9)-Eu(1)-O(4)#4   | 146.03(16) | O(1)#2-Eu(1)-O(5)   | 75.49(12)  |
| O(3)#1-Eu(1)-O(10)  | 149.69(15) | O(2)#3-Eu(1)-O(5)   | 146.80(12) |
| O(1)#2-Eu(1)-O(10)  | 135.62(16) | O(9)-Eu(1)-O(5)     | 95.06(16)  |
| O(2)#3-Eu(1)-O(10)  | 74.29(14)  | O(4)#4-Eu(1)-O(6)   | 126.86(11) |
| O(9)-Eu(1)-O(4)#4   | 146.03(16) | O(10)-Eu(1)-O(6)    | 109.29(16) |
| O(9)-Eu(1)-O(10)    | 73.8(2)    | O(5)-Eu(1)-O(6)     | 52.28(11)  |
| O(4)#4-Eu(1)-O(10)  | 72.89(19)  | O(3)#1-Eu(1)-O(3)#4 | 75.52(10)  |
| O(3)#1-Eu(1)-O(5)   | 131.22(10) | O(1)#2-Eu(1)-O(3)#4 | 67.78(10)  |
| O(2)#3-Eu(1)-O(4)#4 | 90.71(12)  | O(6)-Eu(1)-O(3)#4   | 137.97(12) |
| O(9)-Eu(1)-O(10)    | 72.89(2)   | O(3)#1-Eu(1)-O(1)#2 | 74.27(11)  |
| O(4)#4-Eu(1)-O(10)  | 72.89(19)  | O(3)#1-Eu(1)-O(2)#3 | 79.75(11)  |
| O(3)#1-Eu(1)-O(5)   | 131.22(10) | O(1)#2-Eu(1)-O(2)#3 | 132.57(10) |
| O(1)#2-Eu(1)-O(5)   | 75.49(12)  | O(3)#1-Eu(1)-O(9)   | 84.27(15)  |

|                     |            |                     |            |
|---------------------|------------|---------------------|------------|
| O(2)#3-Eu(1)-O(5)   | 146.80(12) | O(1)#2-Eu(1)-O(9)   | 139.57(16) |
| O(4)#4-Eu(1)-O(5)   | 81.26(11)  | O(2)#3-Eu(1)-O(9)   | 73.97(15)  |
| O(4)#4-Eu(1)-O(3)#4 | 49.83(9)   | O(3)#1-Eu(1)-O(4)#4 | 123.36(10) |
| O(5)-Eu(1)-O(3)#4   | 125.04(11) | O(1)#2-Eu(1)-O(4)#4 | 72.43(12)  |
| O(10)-Eu(1)-O(5)    | 72.55(14)  | O(9)-Eu(1)-O(6)     | 71.32(15)  |
| O(3)#1-Eu(1)-O(6)   | 82.21(11)  | O(2)#3-Eu(1)-O(3)#4 | 67.67(10)  |
| O(1)#2-Eu(1)-O(6)   | 72.09(12)  | O(9)-Eu(1)-O(3)#4   | 139.04(14) |
| O(2)#3-Eu(1)-O(6)   | 142.14(12) | O(4)#4-Eu(1)-O(3)#4 | 49.83(9)   |

Eu/Tb=3/1

|                     |            |                    |            |
|---------------------|------------|--------------------|------------|
| Eu(1)-O(1)#1        | 2.348(5)   | Eu(3)-O(21)#1      | 2.306(4)   |
| Eu(1)-O(10)#2       | 2.366(4)   | Eu(3)-O(13)        | 2.342(5)   |
| Eu(1)-O(9)#3        | 2.383(4)   | Eu(3)-O(14)#5      | 2.404(4)   |
| Eu(1)-O(2)          | 2.418(4)   | Eu(3)-O(22)#6      | 2.408(5)   |
| Eu(1)-O(26)         | 2.435(5)   | Eu(3)-O(30)        | 2.418(5)   |
| Eu(1)-O(24)         | 2.472(5)   | Eu(3)-O(5)         | 2.455(5)   |
| Eu(1)-O(25)         | 2.467(6)   | Eu(3)-O(6)         | 2.468(5)   |
| Eu(1)-O(23)         | 2.479(5)   | Eu(3)-O(31)        | 2.469(6)   |
| Eu(1)-O(1)          | 2.827(5)   | Eu(4)-O(20)#7      | 2.319(5)   |
| Eu(2)-O(17)         | 2.295(4)   | Eu(4)-O(19)        | 2.321(5)   |
| Eu(2)-O(3)          | 2.320(5)   | Eu(4)-O(12)#2      | 2.327(5)   |
| Eu(2)-O(4)#4        | 2.331(4)   | Eu(4)-O(33)        | 2.445(5)   |
| Eu(2)-O(27)         | 2.344(6)   | Eu(4)-O(15)#8      | 2.453(4)   |
| Eu(2)-O(28)         | 2.473(5)   | Eu(4)-O(32)        | 2.456(7)   |
| Eu(2)-O(29)         | 2.477(5)   | Eu(4)-O(34)        | 2.462(5)   |
| Eu(2)-O(8)          | 2.483(5)   | Eu(4)-O(16)#8      | 2.486(5)   |
| Eu(2)-O(7)          | 2.502(5)   |                    |            |
|                     |            |                    |            |
| O(23)-Eu(1)-O(1)    | 124.20(17) | O(25)-Eu(1)-O(1)   | 105.24(18) |
| C(60)-Eu(1)-O(1)    | 138.12(17) | O(17)-Eu(2)-O(29)  | 80.40(19)  |
| O(26)-Eu(1)-O(25)   | 75.6(2)    | O(3)-Eu(2)-O(29)   | 141.43(19) |
| O(24)-Eu(1)-O(25)   | 106.0(2)   | O(4)#4-Eu(2)-O(29) | 74.53(19)  |
| O(1)#1-Eu(1)-O(23)  | 133.35(17) | O(27)-Eu(2)-O(29)  | 71.5(2)    |
| O(10)#2-Eu(1)-O(23) | 76.60(19)  | O(28)-Eu(2)-O(29)  | 68.47(19)  |
| O(2)-Eu(1)-O(1)     | 48.67(14)  | O(17)-Eu(2)-O(8)   | 130.02(17) |
| O(26)-Eu(1)-O(1)    | 137.85(16) | O(3)-Eu(2)-O(8)    | 71.66(18)  |
| O(9)#3-Eu(1)-O(26)  | 72.13(17)  | O(4)#4-Eu(2)-O(8)  | 75.42(17)  |
| O(2)-Eu(1)-O(26)    | 143.0(2)   | O(27)-Eu(2)-O(8)   | 79.8(2)    |
| O(1)#1-Eu(1)-O(24)  | 84.89(17)  | O(28)-Eu(2)-O(8)   | 133.62(17) |
| O(10)#2-Eu(1)-O(24) | 74.42(18)  | O(29)-Eu(2)-O(8)   | 140.43(17) |
| O(9)#3-Eu(1)-O(24)  | 140.59(16) | O(17)-Eu(2)-O(7)   | 78.06(17)  |
| O(2)-Eu(1)-O(24)    | 129.39(16) | O(4)#4-Eu(2)-O(28) | 100.93(18) |
| O(26)-Eu(1)-O(24)   | 70.14(18)  | O(27)-Eu(2)-O(28)  | 76.8(2)    |

|                       |            |                       |            |
|-----------------------|------------|-----------------------|------------|
| O(9)#3-Eu(1)-O(23)    | 144.69(19) | O(3)-Eu(2)-O(7)       | 75.65(18)  |
| O(2)-Eu(1)-O(23)      | 81.50(18)  | O(4)#4-Eu(2)-O(7)     | 125.59(17) |
| O(26)-Eu(1)-O(23)     | 96.2(2)    | O(27)-Eu(2)-O(7)      | 74.1(2)    |
| O(24)-Eu(1)-O(23)     | 52.06(17)  | O(28)-Eu(2)-O(7)      | 140.52(18) |
| O(25)-Eu(1)-O(23)     | 70.1(2)    | O(29)-Eu(2)-O(7)      | 136.96(17) |
| O(1)#1-Eu(1)-O(1)     | 77.80(15)  | O(8)-Eu(2)-O(7)       | 52.64(14)  |
| O(10)#2-Eu(1)-O(1)    | 69.42(15)  | O(17)-Eu(2)-O(3)      | 90.51(19)  |
| O(9)#3-Eu(1)-O(1)     | 67.78(15)  | O(17)-Eu(2)-O(4)#4    | 154.0(2)   |
| O(24)-Eu(1)-O(1)      | 142.79(17) | O(3)-Eu(2)-O(4)#4     | 104.84(18) |
| O(17)-Eu(2)-O(27)     | 95.5(2)    | O(20)#7-Eu(4)-O(19)   | 105.80(17) |
| O(3)-Eu(2)-O(27)      | 147.0(2)   | O(20)#7-Eu(4)-O(12)#2 | 152.80(18) |
| O(4)#4-Eu(2)-O(27)    | 83.0(2)    | O(19)-Eu(4)-O(12)#2   | 84.88(19)  |
| O(17)-Eu(2)-O(28)     | 78.77(17)  | O(20)#7-Eu(4)-O(33)   | 80.36(18)  |
| O(3)-Eu(2)-O(28)      | 73.0(2)    | O(19)-Eu(4)-O(33)     | 140.24(2)  |
| O(22)#6-Eu(3)-O(30)   | 73.01(2)   | O(12)#2-Eu(4)-O(33)   | 75.86(18)  |
| O(21)#1-Eu(3)-O(5)    | 86.17(18)  | O(20)#7-Eu(4)-O(15)#8 | 126.03(18) |
| O(13)-Eu(3)-O(5)      | 78.28(19)  | O(19)-Eu(4)-O(15)#8   | 80.06(18)  |
| O(14)#5-Eu(3)-O(5)    | 145.93(18) | O(12)#2-Eu(4)-O(15)#8 | 79.94(17)  |
| O(22)#6-Eu(3)-O(5)    | 133.39(17) | O(33)-Eu(4)-O(15)#8   | 128.60(18) |
| O(30)-Eu(3)-O(5)      | 104.2(2)   | O(20)#7-Eu(4)-O(32)   | 77.0(2)    |
| O(21)#1-Eu(3)-O(6)    | 133.05(16) | O(19)-Eu(4)-O(32)     | 147.0(2)   |
| O(13)-Eu(3)-O(6)      | 75.65(17)  | O(12)#2-Eu(4)-O(32)   | 107.8(2)   |
| O(14)#5-Eu(3)-O(6)    | 149.03(16) | O(33)-Eu(4)-O(32)     | 72.5(2)    |
| O(21)#1-Eu(3)-O(13)   | 75.06(18)  | O(15)#8-Eu(4)-O(32)   | 72.7(2)    |
| O(21)#1-Eu(3)-O(14)#5 | 77.69(16)  | O(20)#7-Eu(4)-O(34)   | 76.43(18)  |
| O(13)-Eu(3)-O(14)#5   | 124.63(16) | O(19)-Eu(4)-O(34)     | 72.45(17)  |
| O(21)#1-Eu(3)-O(22)#6 | 121.85(17) | O(12)#2-Eu(4)-O(34)   | 83.45(18)  |
| O(13)-Eu(3)-O(22)#6   | 75.09(18)  | O(33)-Eu(4)-O(34)     | 71.07(18)  |
| O(14)#5-Eu(3)-O(22)#6 | 80.08(17)  | O(15)#8-Eu(4)-O(34)   | 148.95(19) |
| O(21)#1-Eu(3)-O(30)   | 147.23(2)  | O(32)-Eu(4)-O(34)     | 137.86(18) |
| O(22)#6-Eu(3)-O(6)    | 84.09(17)  | O(20)#7-Eu(4)-O(16)#8 | 76.69(17)  |
| O(30)-Eu(3)-O(6)      | 73.27(18)  | O(19)-Eu(4)-O(16)#8   | 74.39(18)  |
| O(5)-Eu(3)-O(6)       | 52.34(17)  | O(12)#2-Eu(4)-O(16)#8 | 130.52(15) |
| O(21)#1-Eu(3)-O(31)   | 80.93(19)  | O(33)-Eu(4)-O(16)#8   | 143.25(18) |
| O(13)-Eu(3)-O(31)     | 142.00(19) | O(15)#8-Eu(4)-O(16)#8 | 52.79(15)  |
| O(14)#5-Eu(3)-O(31)   | 76.85(18)  | O(32)-Eu(4)-O(16)#8   | 74.4(2)    |
| O(22)#6-Eu(3)-O(31)   | 142.87(19) | O(34)-Eu(4)-O(16)#8   | 128.98(15) |
| O(30)-Eu(3)-O(31)     | 73.6(2)    | O(6)-Eu(3)-O(31)      | 101.32(19) |
| O(5)-Eu(3)-O(31)      | 71.04(19)  |                       |            |

Eu:Tb=1/1

|               |          |              |          |
|---------------|----------|--------------|----------|
| Tb(1)-O(1)#1  | 2.335(5) | Tb(2)-O(3)   | 2.315(5) |
| Tb(1)-O(10)#2 | 2.360(4) | Tb(2)-O(4)#4 | 2.322(4) |



|                      |            |                       |            |
|----------------------|------------|-----------------------|------------|
| Tb(1)-O(9)#3         | 2.380(4)   | Tb(2)-O(27)           | 2.335(6)   |
| Tb(1)-O(2)           | 2.414(5)   | Tb(2)-O(28)           | 2.464(5)   |
| Tb(1)-O(26)          | 2.426(5)   | Tb(2)-O(8)            | 2.471(4)   |
| Tb(1)-O(24)          | 2.462(5)   | Tb(2)-O(29)           | 2.468(5)   |
| Tb(1)-O(25)          | 2.466(6)   | Tb(2)-O(7)            | 2.503(4)   |
| Tb(1)-O(23)          | 2.472(5)   | Tb(3)-O(21)#1         | 2.300(4)   |
| Tb(1)-O(1)           | 2.831(5)   | Tb(3)-O(13)           | 2.339(4)   |
| Tb(2)-O(17)          | 2.288(4)   | Tb(3)-O(22)#5         | 2.396(5)   |
| Tb(3)-O(14)#6        | 2.397(4)   | Tb(4)-O(12)#2         | 2.321(5)   |
| Tb(3)-O(30)          | 2.407(5)   | Tb(4)-O(33)           | 2.437(5)   |
| Tb(3)-O(5)           | 2.449(5)   | Tb(4)-O(15)#8         | 2.448(4)   |
| Tb(3)-O(6)           | 2.460(4)   | Tb(4)-O(32)           | 2.450(7)   |
| Tb(3)-O(31)          | 2.459(5)   | Tb(4)-O(34)           | 2.461(5)   |
| Tb(4)-O(19)          | 2.309(5)   | Tb(4)-O(16)#8         | 2.476(4)   |
| Tb(4)-O(20)#7        | 2.315(4)   |                       |            |
|                      |            |                       |            |
| O(1)#1-Tb(1)-O(10)#2 | 74.73(16)  | O(4)#4-Tb(2)-O(27)    | 82.7(2)    |
| O(1)#1-Tb(1)-O(9)#3  | 79.46(16)  | O(17)-Tb(2)-O(28)     | 78.75(16)  |
| O(10)#2-Tb(1)-O(9)#3 | 133.33(15) | O(3)-Tb(2)-O(28)      | 72.85(19)  |
| O(1)#1-Tb(1)-O(2)    | 125.25(16) | O(4)#4-Tb(2)-O(28)    | 85.61(17)  |
| O(10)#2-Tb(1)-O(2)   | 76.33(17)  | O(27)-Tb(2)-O(28)     | 139.7(2)   |
| O(9)#3-Tb(1)-O(2)    | 88.28(17)  | O(17)-Tb(2)-O(8)      | 129.94(16) |
| O(1)#1-Tb(1)-O(26)   | 82.6(2)    | O(3)-Tb(2)-O(8)       | 71.57(18)  |
| O(10)#2-Tb(1)-O(26)  | 139.3(2)   | O(4)#4-Tb(2)-O(8)     | 75.47(16)  |
| O(9)#3-Tb(1)-O(26)   | 72.41(17)  | O(27)-Tb(2)-O(8)      | 80.1(2)    |
| O(1)#1-Tb(1)-O(1)    | 77.58(16)  | O(28)-Tb(2)-O(8)      | 133.43(16) |
| O(10)#2-Tb(1)-O(1)   | 69.15(15)  | O(13)-Tb(3)-O(31)     | 142.16(19) |
| O(9)#3-Tb(1)-O(1)    | 67.70(14)  | O(22)#5-Tb(3)-O(31)   | 142.54(19) |
| O(2)-Tb(1)-O(1)      | 48.81(14)  | O(14)#6-Tb(3)-O(31)   | 76.55(17)  |
| O(26)-Tb(1)-O(1)     | 137.92(15) | O(30)-Tb(3)-O(31)     | 73.4(2)    |
| O(24)-Tb(1)-O(1)     | 142.50(16) | O(5)-Tb(3)-O(31)      | 71.07(19)  |
| O(25)-Tb(1)-O(1)     | 105.55(18) | O(6)-Tb(3)-O(31)      | 101.28(18) |
| O(23)-Tb(1)-O(1)     | 124.09(17) | O(21)#1-Tb(3)-O(13)   | 75.45(18)  |
| O(17)-Tb(2)-O(29)    | 80.36(19)  | O(21)#1-Tb(3)-O(22)#5 | 121.92(17) |
| O(3)-Tb(2)-O(29)     | 141.07(19) | O(13)-Tb(3)-O(22)#5   | 75.23(18)  |
| O(4)#4-Tb(2)-O(29)   | 74.70(18)  | O(21)#1-Tb(3)-O(14)#6 | 77.38(16)  |
| O(27)-Tb(2)-O(29)    | 71.5(2)    | O(13)-Tb(3)-O(14)#6   | 124.90(15) |
| O(28)-Tb(2)-O(29)    | 68.27(19)  | O(22)#5-Tb(3)-O(14)#6 | 80.14(17)  |
| O(8)-Tb(2)-O(29)     | 140.82(17) | O(21)#1-Tb(3)-O(30)   | 146.71(19) |
| O(17)-Tb(2)-O(7)     | 78.10(16)  | O(21)#1-Tb(3)-O(13)   | 75.45(18)  |
| O(3)-Tb(2)-O(7)      | 75.55(18)  | O(13)-Tb(3)-O(30)     | 137.21(19) |
| O(4)#4-Tb(2)-O(7)    | 125.65(16) | O(22)#5-Tb(3)-O(30)   | 72.91(19)  |
| O(27)-Tb(2)-O(7)     | 74.6(2)    | O(14)#6-Tb(3)-O(30)   | 76.41(17)  |

|                       |            |                       |            |
|-----------------------|------------|-----------------------|------------|
| O(28)-Tb(2)-O(7)      | 140.35(18) | O(21)#1-Tb(3)-O(5)    | 85.91(17)  |
| O(8)-Tb(2)-O(7)       | 52.54(14)  | O(13)-Tb(3)-O(5)      | 78.15(19)  |
| O(29)-Tb(2)-O(7)      | 137.26(17) | O(22)#5-Tb(3)-O(5)    | 133.81(17) |
| O(17)-Tb(2)-O(3)      | 90.36(19)  | O(14)#6-Tb(3)-O(5)    | 145.49(17) |
| O(17)-Tb(2)-O(4)#4    | 154.12(19) | O(13)-Tb(3)-O(30)     | 137.21(19) |
| O(3)-Tb(2)-O(4)#4     | 104.67(17) | O(30)-Tb(3)-O(5)      | 104.7(2)   |
| O(17)-Tb(2)-O(27)     | 96.0(2)    | O(21)#1-Tb(3)-O(6)    | 133.13(16) |
| O(3)-Tb(2)-O(27)      | 147.4(2)   | O(13)-Tb(3)-O(6)      | 75.53(17)  |
| O(22)#5-Tb(3)-O(6)    | 84.38(16)  | O(12)#2-Tb(4)-O(15)#8 | 79.72(16)  |
| O(14)#6-Tb(3)-O(6)    | 149.19(16) | O(33)-Tb(4)-O(15)#8   | 128.58(18) |
| O(30)-Tb(3)-O(6)      | 73.62(18)  | O(19)-Tb(4)-O(32)     | 146.9(2)   |
| O(5)-Tb(3)-O(6)       | 52.52(16)  | O(20)#7-Tb(4)-O(32)   | 77.0(2)    |
| O(21)#1-Tb(3)-O(31)   | 80.83(19)  | O(12)#2-Tb(4)-O(32)   | 107.4(2)   |
| O(19)-Tb(4)-O(20)#7   | 105.81(17) | O(33)-Tb(4)-O(32)     | 72.6(2)    |
| O(19)-Tb(4)-O(12)#2   | 85.07(18)  | O(15)#8-Tb(4)-O(32)   | 72.6(2)    |
| O(20)#7-Tb(4)-O(12)#2 | 153.07(18) | O(19)-Tb(4)-O(34)     | 72.51(17)  |
| O(19)-Tb(4)-O(33)     | 140.40(19) | O(20)#7-Tb(4)-O(34)   | 76.83(18)  |
| O(20)#7-Tb(4)-O(33)   | 80.33(18)  | O(12)#2-Tb(4)-O(34)   | 83.41(17)  |
| O(12)#2-Tb(4)-O(33)   | 76.01(18)  | O(33)-Tb(4)-O(34)     | 71.01(18)  |
| O(19)-Tb(4)-O(15)#8   | 79.99(18)  | O(15)#8-Tb(4)-O(34)   | 148.78(18) |
| O(20)#7-Tb(4)-O(15)#8 | 125.92(17) | O(32)-Tb(4)-O(34)     | 138.00(18) |
| O(19)-Tb(4)-O(16)#8   | 74.21(17)  | O(15)#8-Tb(4)-O(16)#8 | 52.88(14)  |
| O(20)#7-Tb(4)-O(16)#8 | 76.53(16)  | O(32)-Tb(4)-O(16)#8   | 74.5(2)    |
| O(12)#2-Tb(4)-O(16)#8 | 130.40(15) | O(34)-Tb(4)-O(16)#8   | 129.09(15) |
| O(33)-Tb(4)-O(16)#8   | 143.21(18) |                       |            |

Eu:Tb=1/3

|               |          |               |          |
|---------------|----------|---------------|----------|
| Tb(1)-O(1)#1  | 2.339(4) | Tb(3)-O(21)#1 | 2.296(5) |
| Tb(1)-O(10)#2 | 2.365(5) | Tb(3)-O(13)   | 2.338(5) |
| Tb(1)-O(9)#3  | 2.375(4) | Tb(3)-O(14)#5 | 2.399(4) |
| Tb(1)-O(2)    | 2.409(5) | Tb(3)-O(22)#6 | 2.402(4) |
| Tb(1)-O(26)   | 2.427(5) | Tb(3)-O(30)   | 2.410(6) |
| Tb(1)-O(24)   | 2.459(5) | Tb(3)-O(5)    | 2.452(5) |
| Tb(1)-O(23)   | 2.474(5) | Tb(3)-O(6)    | 2.456(5) |
| Tb(1)-O(25)   | 2.474(6) | Tb(3)-O(31)   | 2.471(5) |
| Tb(1)-O(1)    | 2.836(5) | Tb(4)-O(19)   | 2.309(5) |
| Tb(2)-O(17)   | 2.292(5) | Tb(4)-O(20)#7 | 2.313(5) |
| Tb(2)-O(4)#4  | 2.324(5) | Tb(4)-O(12)#2 | 2.323(5) |
| Tb(2)-O(3)    | 2.327(5) | Tb(4)-O(33)   | 2.439(5) |
| Tb(2)-O(27)   | 2.346(6) | Tb(4)-O(15)#8 | 2.451(5) |
| Tb(2)-O(28)   | 2.468(5) | Tb(4)-O(32)   | 2.450(6) |
| Tb(2)-O(8)    | 2.473(5) | Tb(4)-O(34)   | 2.465(5) |
| Tb(2)-O(29)   | 2.482(5) | Tb(4)-O(16)#8 | 2.478(4) |

|                      |            |                       |            |
|----------------------|------------|-----------------------|------------|
| Tb(2)-O(7)           | 2.500(4)   |                       |            |
|                      |            |                       |            |
| O(1)#1-Tb(1)-O(10)#2 | 74.71(17)  | O(2)-Tb(1)-O(25)      | 68.53(2)   |
| O(9)#3-Tb(1)-O(1)    | 67.56(15)  | O(26)-Tb(1)-O(25)     | 75.8(2)    |
| O(2)-Tb(1)-O(1)      | 48.91(14)  | O(24)-Tb(1)-O(25)     | 106.8(2)   |
| O(26)-Tb(1)-O(1)     | 137.56(16) | O(23)-Tb(1)-O(25)     | 69.9(2)    |
| O(24)-Tb(1)-O(1)     | 142.32(17) | O(1)#1-Tb(1)-C(60)    | 108.80(19) |
| O(23)-Tb(1)-O(1)     | 124.36(18) | O(10)#2-Tb(1)-C(60)   | 72.64(19)  |
| O(25)-Tb(1)-O(1)     | 105.11(18) | O(6)-Tb(3)-O(31)      | 101.18(18) |
| O(9)#3-Tb(1)-C(60)   | 153.59(19) | O(19)-Tb(4)-O(20)#7   | 105.79(17) |
| O(1)#1-Tb(1)-O(1)    | 77.74(16)  | O(19)-Tb(4)-O(12)#2   | 84.77(18)  |
| O(10)#2-Tb(1)-O(1)   | 69.37(15)  | O(20)#7-Tb(4)-O(12)#2 | 152.99(19) |
| O(17)-Tb(2)-O(4)#4   | 154.03(19) | O(19)-Tb(4)-O(33)     | 140.52(19) |
| O(17)-Tb(2)-O(3)     | 90.04(2)   | O(20)#7-Tb(4)-O(33)   | 80.35(18)  |
| O(4)#4-Tb(2)-O(3)    | 104.90(18) | O(12)#2-Tb(4)-O(33)   | 76.15(19)  |
| O(17)-Tb(2)-O(27)    | 96.3(2)    | O(19)-Tb(4)-O(15)#8   | 80.06(18)  |
| O(4)#4-Tb(2)-O(27)   | 82.6(2)    | O(20)#7-Tb(4)-O(15)#8 | 126.17(17) |
| O(3)-Tb(2)-O(27)     | 147.3(2)   | O(12)#2-Tb(4)-O(15)#8 | 79.64(17)  |
| O(17)-Tb(2)-O(28)    | 78.80(17)  | O(33)-Tb(4)-O(15)#8   | 128.35(18) |
| O(4)#4-Tb(2)-O(28)   | 85.31(18)  | O(19)-Tb(4)-O(32)     | 146.8(2)   |
| O(3)-Tb(2)-O(28)     | 73.03(19)  | O(20)#7-Tb(4)-O(32)   | 76.9(2)    |
| O(27)-Tb(2)-O(28)    | 139.6(2)   | O(12)#2-Tb(4)-O(32)   | 108.0(2)   |
| O(17)-Tb(2)-O(8)     | 130.03(16) | O(33)-Tb(4)-O(32)     | 72.6(2)    |
| O(4)#4-Tb(2)-O(8)    | 75.50(17)  | O(15)#8-Tb(4)-O(32)   | 72.6(2)    |
| O(3)-Tb(2)-O(8)      | 71.84(18)  | O(19)-Tb(4)-O(34)     | 72.7(18)   |
| O(27)-Tb(2)-O(8)     | 79.77(19)  | O(20)#7-Tb(4)-O(34)   | 76.53(17)  |
| O(28)-Tb(2)-O(8)     | 133.57(17) | O(12)#2-Tb(4)-O(34)   | 83.35(17)  |
| O(17)-Tb(2)-O(29)    | 80.21(19)  | O(33)-Tb(4)-O(34)     | 71.02(18)  |
| O(4)#4-Tb(2)-O(29)   | 74.86(19)  | O(15)#8-Tb(4)-O(34)   | 148.99(18) |
| O(3)-Tb(2)-O(29)     | 141.37(19) | O(32)-Tb(4)-O(34)     | 137.8(2)   |
| O(27)-Tb(2)-O(29)    | 71.2(2)    | O(19)-Tb(4)-O(16)#8   | 74.14(17)  |
| O(28)-Tb(2)-O(29)    | 68.43(18)  | O(20)#7-Tb(4)-O(16)#8 | 76.75(17)  |
| O(8)-Tb(2)-O(29)     | 140.75(17) | O(12)#2-Tb(4)-O(16)#8 | 130.26(17) |
| O(17)-Tb(2)-O(7)     | 78.28(17)  | O(33)-Tb(4)-O(16)#8   | 143.24(17) |
| O(4)#4-Tb(2)-O(7)    | 125.60(17) | O(15)#8-Tb(4)-O(16)#8 | 52.94(14)  |
| O(3)-Tb(2)-O(7)      | 75.56(18)  | O(32)-Tb(4)-O(16)#8   | 74.4(2)    |
| O(27)-Tb(2)-O(7)     | 74.46(2)   | O(34)-Tb(4)-O(16)#8   | 129.14(15) |
| O(28)-Tb(2)-O(7)     | 140.75(18) | O(21)#1-Tb(3)-O(13)   | 75.53(18)  |
| O(8)-Tb(2)-O(7)      | 52.46(15)  | O(21)#1-Tb(3)-O(14)#5 | 77.69(17)  |
| O(29)-Tb(2)-O(7)     | 136.82(17) | O(13)-Tb(3)-O(14)#5   | 125.00(16) |
| O(22)#6-Tb(3)-O(30)  | 73.29(19)  | O(21)#1-Tb(3)-O(22)#6 | 121.92(18) |
| O(21)#1-Tb(3)-O(5)   | 85.83(18)  | O(13)-Tb(3)-O(22)#6   | 75.05(18)  |
| O(13)-Tb(3)-O(5)     | 78.22(19)  | O(14)#5-Tb(3)-O(22)#6 | 79.99(17)  |

|                     |            |                     |            |
|---------------------|------------|---------------------|------------|
| O(14)#5-Tb(3)-O(5)  | 145.58(17) | O(21)#1-Tb(3)-O(30) | 146.64(19) |
| O(22)#6-Tb(3)-O(5)  | 133.81(17) | O(13)-Tb(3)-O(30)   | 137.27(19) |
| O(30)-Tb(3)-O(5)    | 104.5(2)   | O(14)#5-Tb(3)-O(30) | 76.30(18)  |
| O(13)-Tb(3)-O(31)   | 142.11(19) | O(21)#1-Tb(3)-O(6)  | 133.01(17) |
| O(14)#5-Tb(3)-O(31) | 76.73(17)  | O(13)-Tb(3)-O(6)    | 75.45(17)  |
| O(22)#6-Tb(3)-O(31) | 142.79(19) | O(14)#5-Tb(3)-O(6)  | 149.01(17) |
| O(30)-Tb(3)-O(31)   | 73.2(2)    | O(22)#6-Tb(3)-O(6)  | 84.42(17)  |
| O(21)#1-Tb(3)-O(31) | 80.8(2)    | O(30)-Tb(3)-O(6)    | 73.60(19)  |
| O(5)-Tb(3)-O(31)    | 70.88(18)  | O(21)#1-Tb(3)-O(31) | 80.78(2)   |
| O(5)-Tb(3)-O(6)     | 52.49(17)  |                     |            |

Eu:Tb=1/12

|                      |            |                    |            |
|----------------------|------------|--------------------|------------|
| Tb(1)-O(1)#1         | 2.320(4)   | Tb(3)-O(21)#1      | 2.286(4)   |
| Tb(1)-O(10)#2        | 2.352(4)   | Tb(3)-O(13)        | 2.327(4)   |
| Tb(1)-O(9)#3         | 2.372(4)   | Tb(3)-O(14)#5      | 2.381(4)   |
| Tb(1)-O(2)           | 2.399(4)   | Tb(3)-O(22)#6      | 2.387(4)   |
| Tb(1)-O(26)          | 2.417(5)   | Tb(3)-O(30)        | 2.407(5)   |
| Tb(1)-O(24)          | 2.448(4)   | Tb(3)-O(5)         | 2.438(4)   |
| Tb(1)-O(25)          | 2.453(5)   | Tb(3)-O(31)        | 2.441(5)   |
| Tb(1)-O(23)          | 2.466(5)   | Tb(3)-O(6)         | 2.450(4)   |
| Tb(1)-O(1)           | 2.847(5)   | Tb(4)-O(19)        | 2.295(4)   |
| Tb(2)-O(17)          | 2.281(4)   | Tb(4)-O(20)#7      | 2.308(4)   |
| Tb(2)-O(3)           | 2.297(4)   | Tb(4)-O(12)#2      | 2.311(4)   |
| Tb(2)-O(4)#4         | 2.315(4)   | Tb(4)-O(33)        | 2.429(5)   |
| Tb(2)-O(27)          | 2.338(5)   | Tb(4)-O(15)#8      | 2.438(4)   |
| Tb(2)-O(28)          | 2.453(5)   | Tb(4)-O(32)        | 2.432(5)   |
| Tb(2)-O(29)          | 2.463(4)   | Tb(4)-O(34)        | 2.449(4)   |
| Tb(2)-O(8)           | 2.470(4)   | Tb(4)-O(16)#8      | 2.472(4)   |
| Tb(2)-O(7)           | 2.489(4)   |                    |            |
|                      |            |                    |            |
| O(24)-Tb(1)-O(1)     | 142.41(16) | O(17)-Tb(2)-O(3)   | 90.17(18)  |
| O(1)#1-Tb(1)-O(10)#2 | 74.96(15)  | O(17)-Tb(2)-O(4)#4 | 154.05(17) |
| O(1)#1-Tb(1)-O(9)#3  | 79.67(15)  | O(3)-Tb(2)-O(4)#4  | 104.38(16) |
| O(10)#2-Tb(1)-O(9)#3 | 133.39(14) | O(17)-Tb(2)-O(27)  | 96.2(2)    |
| O(1)#1-Tb(1)-O(2)    | 125.55(15) | O(3)-Tb(2)-O(27)   | 147.56(19) |
| O(10)#2-Tb(1)-O(2)   | 76.42(16)  | O(4)#4-Tb(2)-O(27) | 83.04(19)  |
| O(9)#3-Tb(1)-O(2)    | 87.96(16)  | O(17)-Tb(2)-O(28)  | 78.70(16)  |
| O(1)#1-Tb(1)-O(26)   | 82.34(19)  | O(3)-Tb(2)-O(28)   | 72.87(18)  |
| O(10)#2-Tb(1)-O(26)  | 139.48(18) | O(4)#4-Tb(2)-O(28) | 85.13(16)  |
| O(9)#3-Tb(1)-O(26)   | 72.32(16)  | O(27)-Tb(2)-O(28)  | 139.58(19) |
| O(25)-Tb(1)-O(1)     | 105.65(17) | O(17)-Tb(2)-O(29)  | 80.29(18)  |
| O(23)-Tb(1)-O(1)     | 123.76(17) | O(3)-Tb(2)-O(29)   | 141.10(18) |
| C(60)-Tb(1)-O(1)     | 137.80(16) | O(4)#4-Tb(2)-O(29) | 74.89(17)  |

|                       |            |                       |            |
|-----------------------|------------|-----------------------|------------|
| O(28)-Tb(2)-O(29)     | 68.30(17)  | O(27)-Tb(2)-O(29)     | 71.31(18)  |
| O(17)-Tb(2)-O(8)      | 130.30(15) | O(27)-Tb(2)-O(7)      | 74.40(18)  |
| O(3)-Tb(2)-O(8)       | 71.94(17)  | O(28)-Tb(2)-O(7)      | 140.78(17) |
| O(4)#4-Tb(2)-O(8)     | 75.27(15)  | O(29)-Tb(2)-O(7)      | 136.93(15) |
| O(27)-Tb(2)-O(8)      | 79.84(17)  | O(8)-Tb(2)-O(7)       | 52.70(13)  |
| O(28)-Tb(2)-O(8)      | 133.49(15) | O(21)#1-Tb(3)-O(13)   | 75.53(16)  |
| O(29)-Tb(2)-O(8)      | 140.45(16) | O(21)#1-Tb(3)-O(14)#5 | 77.68(15)  |
| O(17)-Tb(2)-O(7)      | 78.32(15)  | O(13)-Tb(3)-O(14)#5   | 124.90(15) |
| O(3)-Tb(2)-O(7)       | 75.86(16)  | O(21)#1-Tb(3)-O(22)#6 | 122.07(16) |
| O(4)#4-Tb(2)-O(7)     | 125.69(16) | O(20)#7-Tb(4)-O(34)   | 76.50(16)  |
| O(13)-Tb(3)-O(22)#6   | 75.29(16)  | O(12)#2-Tb(4)-O(34)   | 83.33(16)  |
| O(14)#5-Tb(3)-O(22)#6 | 79.83(15)  | O(33)-Tb(4)-O(34)     | 70.91(17)  |
| O(21)#1-Tb(3)-O(30)   | 146.76(17) | O(15)#8-Tb(4)-O(34)   | 149.17(17) |
| O(13)-Tb(3)-O(30)     | 137.14(17) | O(32)-Tb(4)-O(34)     | 137.43(19) |
| O(14)#5-Tb(3)-O(30)   | 76.40(16)  | O(19)-Tb(4)-O(16)#8   | 73.87(16)  |
| O(22)#6-Tb(3)-O(30)   | 72.95(17)  | O(20)#7-Tb(4)-O(16)#8 | 76.72(15)  |
| O(21)#1-Tb(3)-O(5)    | 85.49(17)  | O(12)#2-Tb(4)-O(16)#8 | 130.26(15) |
| O(13)-Tb(3)-O(5)      | 77.99(17)  | O(33)-Tb(4)-O(16)#8   | 143.48(16) |
| O(14)#5-Tb(3)-O(5)    | 145.65(16) | O(15)#8-Tb(4)-O(16)#8 | 53.12(13)  |
| O(22)#6-Tb(3)-O(5)    | 134.01(16) | O(32)-Tb(4)-O(16)#8   | 74.75(19)  |
| O(30)-Tb(3)-O(5)      | 104.86(19) | O(34)-Tb(4)-O(16)#8   | 129.06(14) |
| O(21)#1-Tb(3)-O(31)   | 80.55(18)  | O(20)#7-Tb(4)-O(32)   | 76.8(2)    |
| O(13)-Tb(3)-O(31)     | 142.05(18) | O(12)#2-Tb(4)-O(32)   | 108.1(2)   |
| O(14)#5-Tb(3)-O(31)   | 76.69(16)  | O(33)-Tb(4)-O(32)     | 72.5(2)    |
| O(22)#6-Tb(3)-O(31)   | 142.62(18) | O(15)#8-Tb(4)-O(32)   | 72.8(2)    |
| O(30)-Tb(3)-O(31)     | 73.5(2)    | O(19)-Tb(4)-O(34)     | 72.85(17)  |
| O(5)-Tb(3)-O(31)      | 71.09(18)  | O(19)-Tb(4)-O(15)#8   | 80.21(17)  |
| O(21)#1-Tb(3)-O(6)    | 133.06(15) | O(20)#7-Tb(4)-O(15)#8 | 126.20(16) |
| O(13)-Tb(3)-O(6)      | 75.54(16)  | O(12)#2-Tb(4)-O(15)#8 | 79.57(15)  |
| O(14)#5-Tb(3)-O(6)    | 148.97(15) | O(33)-Tb(4)-O(15)#8   | 128.12(17) |
| O(22)#6-Tb(3)-O(6)    | 84.46(15)  | O(19)-Tb(4)-O(32)     | 146.94(19) |
| O(30)-Tb(3)-O(6)      | 73.46(17)  | O(20)#7-Tb(4)-O(12)#2 | 153.02(17) |
| O(5)-Tb(3)-O(6)       | 52.73(15)  | O(19)-Tb(4)-O(33)     | 140.54(17) |
| O(31)-Tb(3)-O(6)      | 101.34(17) | O(20)#7-Tb(4)-O(33)   | 80.51(17)  |
| O(19)-Tb(4)-O(20)#7   | 105.65(16) | O(12)#2-Tb(4)-O(33)   | 76.03(17)  |
| O(19)-Tb(4)-O(12)#2   | 84.87(17)  |                       |            |

Eu:Tb=0/1

|               |          |               |          |
|---------------|----------|---------------|----------|
| Tb(1)-O(1)#1  | 2.318(5) | Tb(2)-O(7)    | 2.487(5) |
| Tb(1)-O(10)#2 | 2.341(5) | Tb(3)-O(21)#1 | 2.286(5) |
| Tb(1)-O(9)#3  | 2.363(5) | Tb(3)-O(13)   | 2.317(5) |
| Tb(1)-O(2)    | 2.388(5) | Tb(3)-O(14)#5 | 2.374(5) |
| Tb(1)-O(26)   | 2.398(6) | Tb(3)-O(22)#6 | 2.379(5) |

|                      |            |                       |            |
|----------------------|------------|-----------------------|------------|
| Tb(1)-O(24)          | 2.437(5)   | Tb(3)-O(30)           | 2.393(6)   |
| Tb(1)-O(23)          | 2.460(6)   | Tb(3)-O(5)            | 2.429(6)   |
| Tb(1)-O(25)          | 2.470(6)   | Tb(3)-O(31)           | 2.442(6)   |
| Tb(1)-O(1)           | 2.816(6)   | Tb(3)-O(6)            | 2.452(6)   |
| Tb(2)-O(17)          | 2.274(5)   | Tb(4)-O(19)           | 2.286(6)   |
| Tb(2)-O(3)           | 2.297(5)   | Tb(4)-O(20)#7         | 2.301(5)   |
| Tb(2)-O(4)#4         | 2.304(5)   | Tb(4)-O(12)#2         | 2.303(5)   |
| Tb(2)-O(27)          | 2.328(6)   | Tb(4)-O(33)           | 2.425(6)   |
| Tb(2)-O(8)           | 2.457(5)   | Tb(4)-O(15)#8         | 2.431(5)   |
| Tb(2)-O(28)          | 2.457(6)   | Tb(4)-O(32)           | 2.444(7)   |
| Tb(2)-O(29)          | 2.460(6)   | Tb(4)-O(34)           | 2.455(6)   |
| Tb(4)-O(16)#8        | 2.459(5)   |                       |            |
|                      |            |                       |            |
| O(1)#1-Tb(1)-O(10)#2 | 74.80(19)  | O(3)-Tb(2)-O(27)      | 147.8(2)   |
| O(1)#1-Tb(1)-O(9)#3  | 79.76(19)  | O(4)#4-Tb(2)-O(27)    | 82.8(2)    |
| O(10)#2-Tb(1)-O(9)#3 | 133.70(18) | O(17)-Tb(2)-O(8)      | 130.37(19) |
| O(1)#1-Tb(1)-O(2)    | 125.23(19) | O(3)-Tb(2)-O(8)       | 71.9(2)    |
| O(10)#2-Tb(1)-O(2)   | 76.3(2)    | O(4)#4-Tb(2)-O(8)     | 75.04(19)  |
| O(9)#3-Tb(1)-O(2)    | 88.2(2)    | O(27)-Tb(2)-O(8)      | 80.0(2)    |
| O(1)#1-Tb(1)-O(26)   | 82.8(2)    | O(17)-Tb(2)-O(28)     | 78.8(2)    |
| O(10)#2-Tb(1)-O(26)  | 139.5(2)   | O(3)-Tb(2)-O(28)      | 73.0(2)    |
| O(9)#3-Tb(1)-O(26)   | 72.1(2)    | O(4)#4-Tb(2)-O(28)    | 85.4(2)    |
| O(2)-Tb(1)-O(26)     | 142.9(2)   | O(27)-Tb(2)-O(28)     | 139.2(2)   |
| O(1)#1-Tb(1)-O(24)   | 84.7(2)    | O(8)-Tb(2)-O(28)      | 133.70(18) |
| O(10)#2-Tb(1)-O(24)  | 74.4(2)    | O(17)-Tb(2)-O(29)     | 80.0(2)    |
| O(9)#3-Tb(1)-O(24)   | 140.77(19) | O(3)-Tb(2)-O(29)      | 141.0(2)   |
| O(2)-Tb(1)-O(24)     | 129.49(19) | O(4)#4-Tb(2)-O(29)    | 75.2(2)    |
| O(26)-Tb(1)-O(24)    | 70.3(2)    | O(27)-Tb(2)-O(29)     | 71.2(2)    |
| O(1)#1-Tb(1)-O(23)   | 133.69(19) | O(8)-Tb(2)-O(29)      | 140.6(2)   |
| O(10)#2-Tb(1)-O(23)  | 77.3(2)    | O(28)-Tb(2)-O(29)     | 68.1(2)    |
| O(9)#3-Tb(1)-O(23)   | 143.8(2)   | O(17)-Tb(2)-O(7)      | 78.36(19)  |
| O(2)-Tb(1)-O(23)     | 81.7(2)    | O(3)-Tb(2)-O(7)       | 76.0(2)    |
| O(26)-Tb(1)-O(23)    | 95.7(3)    | O(4)#4-Tb(2)-O(7)     | 125.43(19) |
| O(24)-Tb(1)-O(23)    | 52.3(2)    | O(27)-Tb(2)-O(7)      | 74.6(2)    |
| O(1)#1-Tb(1)-O(25)   | 150.3(2)   | O(8)-Tb(2)-O(7)       | 52.68(16)  |
| O(10)#2-Tb(1)-O(25)  | 134.5(2)   | O(28)-Tb(2)-O(7)      | 140.9(2)   |
| O(9)#3-Tb(1)-O(25)   | 74.8(2)    | O(29)-Tb(2)-O(7)      | 136.86(19) |
| O(2)-Tb(1)-O(25)     | 69.4(2)    | O(21)#1-Tb(3)-O(13)   | 75.0(2)    |
| O(26)-Tb(1)-O(25)    | 75.2(3)    | O(21)#1-Tb(3)-O(14)#5 | 77.5(2)    |
| O(24)-Tb(1)-O(25)    | 105.7(3)   | O(13)-Tb(3)-O(14)#5   | 124.68(18) |
| O(23)-Tb(1)-O(25)    | 69.2(3)    | O(21)#1-Tb(3)-O(22)#6 | 121.97(19) |
| O(1)#1-Tb(1)-O(1)    | 77.70(18)  | O(13)-Tb(3)-O(22)#6   | 75.6(2)    |
| O(10)#2-Tb(1)-O(1)   | 69.24(17)  | O(14)#5-Tb(3)-O(22)#6 | 79.9(2)    |

|                       |            |                       |            |
|-----------------------|------------|-----------------------|------------|
| O(9)#3-Tb(1)-O(1)     | 67.93(17)  | O(21)#1-Tb(3)-O(30)   | 146.8(2)   |
| O(2)-Tb(1)-O(1)       | 48.67(17)  | O(13)-Tb(3)-O(30)     | 137.6(2)   |
| O(26)-Tb(1)-O(1)      | 137.88(18) | O(14)#5-Tb(3)-O(30)   | 76.8(2)    |
| O(24)-Tb(1)-O(1)      | 142.5(2)   | O(22)#6-Tb(3)-O(30)   | 73.3(2)    |
| O(23)-Tb(1)-O(1)      | 124.5(2)   | O(21)#1-Tb(3)-O(5)    | 85.7(2)    |
| O(25)-Tb(1)-O(1)      | 105.9(2)   | O(13)-Tb(3)-O(5)      | 78.2(2)    |
| O(17)-Tb(2)-O(3)      | 90.6(2)    | O(14)#5-Tb(3)-O(5)    | 145.4(2)   |
| O(17)-Tb(2)-O(4)#4    | 154.2(2)   | O(22)#6-Tb(3)-O(5)    | 134.1(2)   |
| O(3)-Tb(2)-O(4)#4     | 104.2(2)   | O(30)-Tb(3)-O(5)      | 104.2(2)   |
| O(17)-Tb(2)-O(27)     | 95.9(3)    | O(21)#1-Tb(3)-O(6)    | 132.8(2)   |
| O(13)-Tb(3)-O(6)      | 75.5(2)    | O(14)#5-Tb(3)-O(6)    | 149.4(2)   |
| O(22)#6-Tb(3)-O(6)    | 84.4(2)    | O(19)-Tb(4)-O(34)     | 72.5(2)    |
| O(30)-Tb(3)-O(6)      | 73.6(2)    | O(20)#7-Tb(4)-O(34)   | 77.2(2)    |
| O(5)-Tb(3)-O(6)       | 52.7(2)    | O(12)#2-Tb(4)-O(34)   | 82.6(2)    |
| O(31)-Tb(3)-O(6)      | 102.1(2)   | O(33)-Tb(4)-O(34)     | 70.8(2)    |
| O(19)-Tb(4)-O(20)#7   | 105.3(2)   | O(15)#8-Tb(4)-O(34)   | 148.2(2)   |
| O(19)-Tb(4)-O(12)#2   | 85.1(2)    | O(32)-Tb(4)-O(34)     | 137.9(2)   |
| O(20)#7-Tb(4)-O(12)#2 | 153.0(2)   | O(19)-Tb(4)-O(16)#8   | 73.8(2)    |
| O(19)-Tb(4)-O(33)     | 140.6(2)   | O(20)#7-Tb(4)-O(16)#8 | 76.7(2)    |
| O(20)#7-Tb(4)-O(33)   | 79.9(2)    | O(21)#1-Tb(3)-O(31)   | 80.4(2)    |
| O(12)#2-Tb(4)-O(33)   | 76.6(2)    | O(13)-Tb(3)-O(31)     | 141.9(2)   |
| O(19)-Tb(4)-O(15)#8   | 79.8(2)    | O(14)#5-Tb(3)-O(31)   | 76.2(2)    |
| O(20)#7-Tb(4)-O(15)#8 | 126.2(2)   | O(22)#6-Tb(3)-O(31)   | 142.5(2)   |
| O(12)#2-Tb(4)-O(15)#8 | 79.7(2)    | O(30)-Tb(3)-O(31)     | 73.4(2)    |
| O(33)-Tb(4)-O(15)#8   | 129.2(2)   | O(5)-Tb(3)-O(31)      | 71.2(2)    |
| O(19)-Tb(4)-O(32)     | 147.1(2)   | O(12)#2-Tb(4)-O(16)#8 | 130.36(19) |
| O(20)#7-Tb(4)-O(32)   | 77.3(2)    | O(33)-Tb(4)-O(16)#8   | 143.1(2)   |
| O(33)-Tb(4)-O(32)     | 72.3(3)    | O(15)#8-Tb(4)-O(16)#8 | 52.97(17)  |
| O(15)#8-Tb(4)-O(32)   | 73.1(2)    | O(32)-Tb(4)-O(16)#8   | 75.1(2)    |
| O(34)-Tb(4)-O(16)#8   | 129.39(18) |                       |            |
